# 1 A comprehensive survey of genetic variation in 20,691 subjects from four large cohorts

2 Sara Lindström<sup>1,2,3</sup>, Stephanie Loomis<sup>4</sup>, Constance Turman<sup>1,2</sup>, Hongyan Huang<sup>1,2</sup>, Jinyan Huang<sup>1,2</sup>,  
3 Hugues Aschard<sup>1,2</sup>, Andrew T. Chan<sup>5</sup>, Hyon Choi<sup>6</sup>, Marilyn Cornelis<sup>7</sup>, Gary Curhan<sup>8,9</sup>, Immaculata  
4 De Vivo<sup>1,2,8</sup>, A. Heather Eliassen<sup>2,8</sup>, Charles Fuchs<sup>8,10</sup>, Michael Gaziano<sup>11</sup>, Susan E. Hankinson<sup>2,7,12</sup>,  
5 Frank Hu<sup>2,13</sup>, Majken Jensen<sup>8,13</sup>, Jae H. Kang<sup>8</sup>, Christopher Kabrhel<sup>8,14</sup>, Liming Liang<sup>1,2,15</sup>, Louis R.  
6 Pasquale<sup>4,8</sup>, Eric Rimm<sup>2,8,13</sup>, Meir J. Stampfer<sup>2,8,13</sup>, Rulla M. Tamimi<sup>2,8</sup>, Shelley S. Tworoger<sup>2,8</sup>,  
7 Janey L. Wiggs<sup>4</sup>, David J. Hunter<sup>1,2,8,13</sup> and Peter Kraft<sup>1,2,15</sup>

8  
9 <sup>1</sup> Program in Genetic Epidemiology and Statistical Genetics, Harvard T.H. Chan School of Public Health,  
10 Boston, MA

11 <sup>2</sup> Department of Epidemiology, Harvard T.H. Chan School of Public Health, Boston, MA

12 <sup>3</sup> Department of Epidemiology, University of Washington, Seattle, WA

13 <sup>4</sup> Department of Ophthalmology, Harvard Medical School, Massachusetts Eye and Ear Infirmary, Boston,  
14 MA

15 <sup>5</sup> Gastrointestinal Unit, Massachusetts General Hospital, Boston, MA

16 <sup>6</sup> Section of Rheumatology and Clinical Epidemiology Unit, Boston University School of Medicine, Boston,  
17 MA

18 <sup>7</sup> Department of Preventive Medicine, Northwestern University Feinberg School of Medicine, Chicago, IL

19 <sup>8</sup> Channing Division of Network Medicine, Brigham and Women's Hospital and Harvard Medical School,  
20 Boston, MA

21 <sup>9</sup> Renal Division, Department of Medicine, Brigham and Women's Hospital, Boston, MA

22 <sup>10</sup> Department of Medical Oncology, Dana-Farber Cancer Institute and Harvard Medical School, Boston,  
23 MA

24 <sup>11</sup> Division of Aging, Department of Medicine, Brigham and Women's Hospital, Boston, MA

25 <sup>12</sup> Department of Biostatistics and Epidemiology, University of Massachusetts, Amherst, MA

26 <sup>13</sup> Department of Nutrition, Harvard T.H. Chan School of Public Health, Boston, MA

27 <sup>14</sup> Department of Emergency Medicine, Center for Vascular Emergencies, Massachusetts General Hospital,  
28 Harvard Medical School, Boston, MA

29 <sup>15</sup> Department of Biostatistics, Harvard T.H. Chan School of Public Health, Boston, MA

30  
31 Keywords: GWAS, cohorts, imputation, secondary analysis, association

32

33

34

35

36

37

38

39

40 Correspondence to

41 Sara Lindstrom

42 University of Washington

43 Office F247B

44 Box 357236

45 Department of Epidemiology

46 Health Sciences Building

47 Tel: 206-221-3148

48 [saralind@uw.edu](mailto:saralind@uw.edu)

## ABSTRACT

The Nurses' Health Study (NHS), Nurses' Health Study II (NHSII), Health Professionals Follow Up Study (HPFS) and the Physicians Health Study (PHS) have collected detailed longitudinal data on multiple exposures and traits for approximately 310,000 study participants over the last 35 years. Over 160,000 study participants across the cohorts have donated a DNA sample and to date, 20,691 subjects have been genotyped as part of genome-wide association studies (GWAS) of twelve primary outcomes. However, these studies utilized six different GWAS arrays making it difficult to conduct analyses of secondary phenotypes or share controls across studies. To allow for secondary analyses of these data, we have created three new datasets merged by platform family and performed imputation using a common reference panel, the 1,000 Genomes Phase I release. Here, we describe the methodology behind the data merging and imputation and present imputation quality statistics and association results from two GWAS of secondary phenotypes (body mass index (BMI) and venous thromboembolism (VTE)).

We observed the strongest BMI association for the *FTO* SNP rs55872725 ( $\beta=0.45$ ,  $p=3.48 \times 10^{-22}$ ), and using a significance level of  $p=0.05$ , we replicated 19 out of 32 known BMI SNPs. For VTE, we observed the strongest association for the rs2040445 SNP (OR=2.17, 95% CI: 1.79-2.63,  $p=2.70 \times 10^{-15}$ ), located downstream of *F5* and also observed significant associations for the known *ABO* and *F11* regions. This pooled resource can be used to maximize power in GWAS of phenotypes collected across the cohorts and for studying gene-environment interactions as well as rare phenotypes and genotypes.

## INTRODUCTION

Large, well-phenotyped cohort studies have constituted the backbone of epidemiology for several decades. Prospectively collected longitudinal information on exposures and outcomes enables a broad spectrum of analyses and has led to novel insights into disease etiology, such as the link between smoking and lung cancer [1,2] as well as the link between both high cholesterol levels and trans fatty acids with coronary heart disease [3,4]. Many existing cohorts collect biological specimens from their participants, allowing for studies of inherited genetic variation as well as prospectively measured biomarkers such as metabolomic profiles [5] and circulating hormone levels [6]. Genome-wide association studies (GWAS) are currently a main engine of genetic epidemiology and have led to the identification of thousands of loci for hundreds of traits (for an overview and its clinical applications, see Manolio [7]). When designing a GWAS, cost is still the determining factor and consequently, GWAS within cohorts are often conducted within nested case-control studies or sub-cohorts. In contrast, the Women's Genome Health Study (WGHS) [8] genotyped the entire cohort of 27,000 women and the Genetic Epidemiology Research on Adult Health and Aging (GERA) Cohort has generated GWAS data on almost 100,000 individuals [9]. However, in many instances, GWAS are tied to specific funding sources acquired for studying a pre-defined outcome and only a small fraction of the cohort is genotyped at a specific time.

Within the Nurses' Health Study (NHS) [10], Nurses' Health Study II (NHSII) [11], Health Professional Follow Up Study (HPFS) [12] and the Physicians' Health Study (PHS) [13], since 2007, we have, conducted twelve GWAS of different traits including type 2 diabetes [14], coronary heart disease [15], several cancer types [16-19] and mammographic density [20,21]. In total, we have assembled GWAS data for 20,769 individuals across the cohorts, creating unprecedented

opportunities to conduct secondary analyses on other collected outcomes. Indeed, we have used one or many of these GWAS to analyze secondary phenotypes including but not limited to body anthropometrics [22-24], hair color [25], reproductive aging [26], smoking behavior [27], telomere length [28], mammographic density [29], cutaneous nevi [30], melanoma [30], depressive symptoms [31], coffee consumption [32] as well as circulating levels of B12 [33], folate [34], hormones [35], vitamins [36,37], retinol [38] and e-selectin [39]. However, GWAS of secondary traits face practical issues in terms of different genotyping arrays, low variability in the phenotype of interest within a single GWAS (e.g. rare diseases where only a handful of cases may occur in the original GWAS), and theoretical issues including ascertainment bias due to oversampling of cases [40] or differential genotype/imputation quality between studies [41] (e.g. if controls are “utilized” from GWAS data generated on a different genotype platform).

Here, we describe our pipeline for merging and imputing the individual GWAS datasets within NHS, NHSII, HPFS and PHS. Datasets were merged based on genotype platform family and all data were subsequently imputed to a common reference panel (the 1,000 Genomes Phase I release [42]). We present proof-of-principle results from genome-wide analysis of body mass index (BMI) and venous thromboembolism (VTE).

# **METHODS**

## Description of NHS, NHSII, HPFS and PHS

In 1976, the Nurses' Health Study (NHS) was launched with the goal of studying women's health [10]. Since that time, 121,700 nurse participants have answered biennial questionnaires (response rate >90% over time) about personal and physical characteristics, physical activity and ability, reproductive history, family history of disease, environmental/personal exposures, diet and dietary supplements, screening, disease and health conditions, prescription and over-the-counter medications, and psychosocial history. In addition, 32,826 blood and 29,684 cheek cell samples have been collected since the late 1980s. An additional 116,430 nurses were recruited in 1989 as a part of Nurses' Health Study II (NHSII) and have returned biennial questionnaires similar to those used for NHS [11]. For NHSII, we have collected blood samples for 29,612 women and cheek cell samples for an additional 29,859 women. The Health Professional Follow-Up Study (HPFS) began in 1986 with the aim of studying men's health [12]. A total of 51,529 men in health professions were recruited, and every two years, members of the study receive questionnaires similar to the ones used in NHS. In HPFS, we have collected blood samples from 18,159 participants and cheek cell samples from an additional 13,956 men. The Physicians' Health Study (PHS) is a randomized primary prevention trial of aspirin and supplements among 29,067 United States physicians followed with annual questionnaires since 1982 [13]. A total of 14,916 men provided a baseline blood sample.

## Ethics Statement

Each GWAS study was approved by the Brigham and Women's Hospital Institutional Review Board. Return of the mailed self-administered questionnaires was voluntary. Thus, receipt of a completed questionnaire was considered as evidence of a desire to participate in the study and was taken as a formal indication of consent.

140

# 141 Description of GWAS studies and genotyping

142 Since 2007, twelve separate GWAS have been conducted within these four cohorts (**Table 1**).

143 The primary traits are breast cancer [16], pancreatic cancer [43], glaucoma [44], endometrial

144 cancer [17], colon cancer [19], glioma [45], prostate cancer [18], type 2 diabetes [14], coronary

145 heart disease [15], kidney stones, gout and mammographic density [20]. These studies were

146 genotyped on six different arrays (**Table 1**) at four different genotyping centers (National Cancer

147 Institute, Broad Institute, University of Southern California and Rosetta/Merck). Standard quality

148 control filters for call rate, Hardy-Weinberg equilibrium, and other measures were applied to the

149 genotyped SNPs and/or samples. In total, these GWAS data sets comprise 20,769 participants

150 including 11,522 from NHS, 934 subjects from NHSII, 7,018 subjects from HPFS and 1,305

151 subjects from PHS.

152

153

154 **Table 1: GWAS datasets in HPFS, NHS, NHSII and PHS**  
155

| Cohort | Outcome                | Subjects<br>(cases/controls) | Platform             | GWAS dataset                                                                              |
|--------|------------------------|------------------------------|----------------------|-------------------------------------------------------------------------------------------|
| HPFS   | Coronary Heart Disease | 435/878                      | Affymetrix 6.0       | AffyMetrix                                                                                |
| HPFS   | Type 2 Diabetes        | 1,189/1,298                  | Affymetrix 6.0       | AffyMetrix                                                                                |
| HPFS   | Pancreatic Cancer      | 54/52                        | Illumina 550k        | Illumina HumanHap                                                                         |
| HPFS   | Kidney Stone           | 315/238                      | Illumina 610k        | Illumina HumanHap                                                                         |
| HPFS   | Prostate Cancer        | 218/205                      | Illumina 610k        | Illumina HumanHap                                                                         |
| HPFS   | Glaucoma               | 178/299                      | Illumina 660W        | Illumina HumanHap                                                                         |
| HPFS   | Glioma                 | 26/0                         | Illumina 660W        | Illumina HumanHap                                                                         |
| HPFS   | Colon Cancer           | 229/230                      | Illumina OmniExpress | Illumina OmniExpress                                                                      |
| HPFS   | Gout                   | 717/699                      | Illumina OmniExpress | Illumina OmniExpress                                                                      |
|        | <b>SUBTOTAL</b>        |                              |                      | <b>7,018 (1,511 Illumina Human Hapmap, 3,634 Affymetrix, 1,873 Illumina OmniExpress)</b>  |
| NHS    | Type 2 Diabetes        | 1,532/1,754                  | Affymetrix 6.0       | AffyMetrix                                                                                |
| NHS    | Coronary Heart Disease | 342/804                      | Affymetrix 6.0       | AffyMetrix                                                                                |
| NHS    | Ovarian Cancer         | 36/0                         | Illumina 317k        | Illumina HumanHap                                                                         |
| NHS    | Breast Cancer          | 1,145/1,142                  | Illumina 550k        | Illumina HumanHap                                                                         |
| NHS    | Pancreatic Cancer      | 82/84                        | Illumina 550k        | Illumina HumanHap                                                                         |
| NHS    | Kidney Stone           | 328/166                      | Illumina 610k        | Illumina HumanHap                                                                         |
| NHS    | Glaucoma               | 313/497                      | Illumina 660W        | Illumina HumanHap                                                                         |
| NHS    | Glioma                 | 38/0                         | Illumina 660W        | Illumina HumanHap                                                                         |
| NHS    | Endometrial Cancer     | 396/348                      | Illumina OmniExpress | Illumina OmniExpress                                                                      |
| NHS    | Colon Cancer           | 394/774                      | Illumina OmniExpress | Illumina OmniExpress                                                                      |
| NHS    | Mammographic density   | 153/641                      | Illumina OmniExpress | Illumina OmniExpress                                                                      |
| NHS    | Gout                   | 319/392                      | Illumina OmniExpress | Illumina OmniExpress                                                                      |
|        | <b>SUBTOTAL</b>        |                              |                      | <b>11,522 (3,711 Illumina Human Hapmap, 4,413 Affymetrix, 3,380 Illumina OmniExpress)</b> |
| NHSII  | Breast Cancer          | 289/0                        | Illumina 610k        | Illumina HumanHap                                                                         |
| NHSII  | Kidney Stone           | 341/294                      | Illumina 610k        | Illumina HumanHap                                                                         |
|        | <b>SUBTOTAL</b>        |                              |                      | <b>924 (924 Illumina Human Hapmap, 0 Affymetrix, 0 Illumina OmniExpress)</b>              |
| PHS    | Pancreatic Cancer      | 49/54                        | Illumina 550k        | Illumina HumanHap                                                                         |
| PHS    | Prostate Cancer        | 312/363                      | Illumina 610k        | Illumina HumanHap                                                                         |
| PHS    | Colon Cancer           | 331/333                      | Illumina OmniExpress | Illumina OmniExpress                                                                      |
|        | <b>SUBTOTAL</b>        |                              |                      | <b>1,305 (641 Illumina Human Hapmap, 0 Affymetrix, 664 Illumina OmniExpress)</b>          |
|        | <b>TOTAL</b>           |                              |                      | <b>20,769 (6,787 Illumina Human Hapmap, 8,065 Affymetrix, 5,917 Illumina OmniExpress)</b> |

## Dataset merging

Successfully merging genotype data for different individuals requires complete overlap in SNPs. SNPs that are missing by design (due to different genotyping platforms) from some studies will be correlated with the primary phenotype for that dataset. This might cause spurious results in any secondary analysis on related traits. Although a missing SNP can be imputed, it will have a higher degree of inaccuracy in imputed compared with genotyped SNPs, potentially creating differential measurement error that could also lead to bias [41,46,47]. Therefore, we first looked at the overlap of SNPs between different genotyping arrays and identified three broad platform families with high degree of overlap within category but low overlap across categories – the earlier generation of Illumina arrays (HumanHap), the Illumina OmniExpress array and Affymetrix 6.0 array. The HumanHap platform had a total of 459,999 SNPs compared with 565,810 SNPs for OmniExpress and 668,283 SNPs for Affymetrix 6.0. However, the intersection among all three platform families was only 75,285 SNPs (**Figure 1**). To achieve the largest GWAS datasets as possible without losing SNP information, we created three datasets – HumanHap comprising six GWAS datasets, OmniExpress comprising four GWAS datasets and Affymetrix 6.0 comprising two GWAS datasets. In the merging process, we removed any SNPs that were not in all studies for a specific platform or had a missing call rate >5%. We flipped strands where appropriate and removed A/T and C/G SNPs to create the final compiled datasets.

## Figure 1: Overlap in SNPs across genotype platforms

We ran a pairwise identity by descent (IBD) analysis within and across the combined dataset to detect duplicate and related individuals based on resulting IBD probabilities  $Z_0$ ,  $Z_1$  and  $Z_2$  ( $Z_k$  is probability that a pair of subjects share  $k$  alleles identical by descent, estimated from genome-



wide SNP data). If  $0 \leq Z_0 \leq 0.1$  and  $0 \leq Z_1 \leq 0.1$  and  $0.9 \leq Z_2 \leq 1.1$  then a pair was flagged as being identical twins or duplicates. Pairs were considered full siblings if  $0.17 \leq Z_0 \leq 0.33$  and  $0.4 \leq Z_1 \leq 0.6$  and  $0.17 \leq Z_2 \leq 0.33$ . Half siblings or avunculars were defined as having  $0.4 \leq Z_1 \leq 0.6$  and  $0 \leq Z_2 \leq 0.1$ . Some of the duplicates flagged were expected, having been genotyped in multiple datasets and hence having the same cohort identifiers. In this case, one of each pair was randomly chosen for removal from the dataset. In instances where pairs showed pairwise genotype concordance rate  $> 0.999$  but were not expected duplicates, both individuals were removed. Related individuals (full siblings, half siblings/avunculars) were not removed from the final datasets. In the HumanHap dataset, 107 individuals were removed because they were duplicates or flagged for removal in the genotyping step, leaving 6,787 subjects. In addition, 8 pairs of individuals were flagged as related. In the OmniExpress dataset, we removed 39 subjects leaving 5,917 IDs and 5 pairs of related subjects. In the Affymetrix dataset, 167 individuals were removed because they were duplicates or were flagged for removal from secondary genotype data cleaning, leaving a total of 8,065 individuals. Across all three datasets, we identified 444 duplicate pairs (406 expected) and thus removed additional 482 individuals from analysis across all three platform families.

After removing duplicate and related pairs of IDs, we used EIGENSTRAT [48] to run principal component analysis (PCA) on each dataset, removing one member from each flagged pair of related individuals. For Affymetrix and HumanHap, we used approximately 12,000 SNPs from Yu et al [49] that were filtered to ensure low pairwise linkage disequilibrium (LD). For the OmniExpress dataset we used approximately 33,000 SNPs that were similarly filtered. The top principal components were manually checked for outliers.

To identify any SNPs that created spurious associations, we ran several logistic regression analyses among subjects that were selected as controls in the initial GWAS (i.e. excluding all case subjects). For each regression, we used cohort-specific controls from one original GWAS as cases and the rest of the controls in that dataset as controls. For example, in the OmniExpress dataset, we considered NHS controls from the gout GWAS as “cases” while treating controls from the gout (HPFS), endometrial cancer (NHS), colon cancer (NHS, HPFS and PHS), and mammographic density (NHS) as “controls”. We repeated this, treating each cohort-specific “controls set” as “cases” and all other controls as “controls”. For each GWAS, we extracted genome-wide significant SNPs ( $p < 10^{-8}$ ) and examined QQ plots. In the Affymetrix dataset, 100 SNPs were flagged and removed. In the HumanHap dataset, 8 SNPs had  $p < 10^{-8}$  in at least one of the QC regressions and were removed. No SNPs in the OmniExpress dataset had  $p < 10^{-8}$  and hence, no SNP was removed.

## Imputation

After the datasets were combined and appropriate SNP and subjects filters applied, the compiled datasets were separately imputed. We used the 1000 Genomes Project ALL Phase I Integrated Release Version 3 Haplotypes excluding monomorphic and singleton sites (2010-11 data freeze, 2012-03-14 haplotypes) as the reference panel. SNP and indel genotypes were imputed in three steps. First, genotypes on each chromosome were split into chunks to facilitate windowed imputation in parallel using ChunkChromosome (v.2011-08-05). Then each chunk of chromosome was phased using MACH [50,51] (v.1.0.18.c). In the final step, Minimac (v.2012-08-15) was used to impute the phased genotypes to approximately 31 million markers in the 1000 Genomes Project.

## “Proof of Principle” GWAS– BMI and VTE

To validate our merged GWAS datasets, we conducted two proof-of principle GWAS of one quantitative trait (BMI) and one binary trait (VTE). We defined BMI as weight (kg)/height<sup>2</sup> (cm) and obtained it by extracting information on weight from the accompanying questionnaire collected at time of blood draw. If weight information was missing, we extracted it from the questionnaire closest in time to time of blood draw. Height was extracted from the baseline questionnaire. We obtained data on BMI for 20,283 participants. VTE is a spectrum of disease that includes pulmonary embolism (PE) and deep vein thromboembolism (DVT). Physician-diagnosed PE has been asked on every biennial NHS questionnaire since 1982, and every NHSII and HPFS questionnaire since cohort inception. In the NHS, DVT without PE is captured when a nurse answers that she has had phlebitis or thrombophlebitis (ICD-9=453.x). In NHS, NHSII and HPFS cohorts through 2010 (we did not have VTE data for PHS), we identified 6,041 individuals who reported VTE. Self-reported PE was verified through medical records review by a trained physician (CK). DVT cases are based on self-report, though a validation study of 100 DVT cases found self-reports to be highly consistent (>96%) with medical record review. In total, we identified 1,364 VTE cases with GWAS data. We treated all non-VTE cases with GWAS data as controls (n=17,628). Since we did not have data on VTE in PHS, we excluded PHS from this analysis.

## Statistical analysis – GWAS

SNPs and indels with an imputation quality score <0.3 (as defined by the RSQR\_HAT value in MACH) or a minor allele frequency (MAF) <0.01 were excluded. Primary association analysis was performed separately within each platform family (HumanHap, OmniExpress and Affymetrix). For imputed SNPs, the estimated number of effect alleles (ranging from 0 to 2) was used as a

covariate. For BMI, we conducted linear regression adjusting for study (indicator variables including cohort as well as primary GWAS outcome), age at blood draw and the top four principal components. For VTE, we conducted logistic regression adjusting for study as above and the top four principal components. For both BMI and VTE, we combined platform family-specific results with fixed-effects meta-analysis using the METAL [52] software. We used the Cochran's Q statistic to test for heterogeneity across studies.

## RESULTS

### Imputation statistics

We imputed a total of 31,326,389 markers (29,890,747 SNPs and 1,435,642 indels) and the majority (69%) of these had a MAF<0.01. The average imputation quality score by minor frequency for each platform family is shown in **Figure 2**. The imputation quality was very similar across all three datasets (**Suppl Figures 1-3**) with 49-51% of markers having an imputation quality score  $\geq 0.3$ . When restricting to markers with MAF>0.01 (~10 million), 92-94% of the markers had a quality score  $\geq 0.3$ . After filtering markers based on MAF (>0.01) and imputation  $r^2$  ( $\geq 0.3$ ), approximately 9.8 million markers were available for analysis.

**Figure 2:** Imputation quality score by minor allele frequency for the three platform families

### BMI results

We had BMI and GWAS data for 20,283 individuals (n=6,762 for HumanHap, n=5,844 for OmniExpress, n=7,677 for AffyMetrix) within NHS, NHSII, HPFS and PHS. Platform-specific QQ-plots (**Suppl Figures 4a-c**) showed no indication of systematic bias (genomic inflation factor  $\lambda=1.00-1.02$ ). The results from the meta-analysis are shown in **Figures 3 and 4**. We observed a tail of strongly associated SNPs with the top SNPs located in the known BMI *FTO* locus (strongest associated SNP: rs55872725,  $\beta=0.45$ ,  $p=3.48 \times 10^{-22}$ ). We also observed genome-wide significant associations for the previously identified *TMEM18* (strongest associated SNP: rs7563362,  $\beta=-0.36$ ,  $p=1.76 \times 10^{-8}$ ) and *FANCL* loci (strongest associated SNP: rs980183,  $\beta=-0.26$ ,  $p=2.73 \times 10^{-8}$ ). Using a significance level of  $p=0.05$ , 59% (19/32) known BMI SNPs [53], showed association with BMI in our data. In addition, 31 out of the 32 known SNPs showed associations in the same direction as the original BMI study (**Figure 5**).

**Figure 3:** QQ-plot for GWAS analysis of body mass index based on 20,283 individuals.

**Figure 4:** Manhattan plot for GWAS analysis of body mass index based on 20,283 individuals.

**Figure 5:** Associations for known body mass index.

# VTE results

We had information on VTE status and GWAS data for 1,364 cases and 17,628 controls within NHS, NHSII and HPFS. The median number of case subjects by dataset was 87.5 and ranged from 16 in the NHSII breast cancer GWAS dataset (total of 289 individuals) to 417 in the type 2 diabetes GWAS dataset (total of 5,773 individuals). The small number of cases in many individual GWAS data sets led to unstable study-specific association statistics. Restricting to studies with an expected case minor allele count >10 for SNPs with a MAF of 0.05 (i.e. studies with at least 200 cases) reduced the sample size to 417 cases and 5,356 controls. However, within each compiled imputed GWAS dataset, VTE case numbers ranged from 406 (OmniExpress) to 532 (Affymetrix). Thus, combining the individual GWAS datasets into three main datasets enabled association analysis of hundreds of cases rather than tens, leading to more stable estimates in the regression analysis. Platform-specific QQ-plots (**Suppl Figures 5a-c**) showed no indication of systematic bias (genomic inflation factor  $\lambda=1.00-1.01$ ). The results from the meta-analysis are shown in **Figures 6 and 7** (genomic inflation factor  $\lambda=1.00$ ). We observed a strong association located downstream of the *F5* gene (strongest associated SNP: rs2040445, OR=2.17, 95% CI: 1.79-2.63,  $p=2.70 \times 10^{-15}$ ). We also observed genome-wide significant associations for the ABO locus (strongest associated SNP: rs2519093, OR=1.36, 95% CI: 1.23-1.49,  $p=1.51 \times 10^{-10}$ ) and a nominal association ( $P=0.007$ ) with the previously VTE-associated *F11* locus.

307 **Figure 6:** QQ-plot for GWAS analysis of venous thromboembolism based on 1,364 cases and  
 308 17,628 controls.  
 309 **Figure 7:** Manhattan plot for GWAS analysis of venous thromboembolism based on 1,364 cases  
 310 and 17,628 controls.  
 311

## DISCUSSION

Thousands of genetic loci associated with hundreds of complex traits have been identified through GWAS and as sample sizes continue to increase, more loci will be discovered. Although the cost of GWAS has dropped, lack of financial resources is still the limiting factor for generating new data. Most GWAS have been conducted in case-control studies, and this has led to the creation of disease-specific consortia in which power can be maximized. However, there is usually only one disease phenotype available from these cases, and little capacity to follow cases or controls to collect information on additional phenotypes that develop over time. Cohort studies are designed to collect multiple endpoints on individuals, but often suffer from limited power for a specific disease. To maximize the utility of existing cohort data resources, it is important to explore associations with additional traits and outcomes that have been collected for individuals in multiple cohorts. In particular, the accumulation of GWAS data within large cohorts with rich environmental and outcome data creates new opportunities to assess novel hypotheses. In addition, cohort studies provide unique opportunities to prospectively assess biomarker-disease associations, thereby minimizing bias due to reverse causation or treatment effects. However, “borrowing” GWAS data between traits is not straightforward. Known issues that can cause bias include technical artifacts due to different genotyping platforms, differences in imputation accuracy and ascertainment bias. Thus, careful data management, imputation procedures and quality checks are needed. Furthermore, if the secondary trait is rare, there will be low phenotypic variability within each GWAS dataset. For example, we observed fewer than 100 VTE cases within the majority of individual GWAS, compared to more than 400 cases within each combined dataset.



Our pipeline for combining and imputing twelve different GWAS datasets can overcome both technical and methodological issues. We chose to create three different datasets defined by platform family (in our case, Illumina HumanHap, Illumina OmniExpress and AffyMetrix) since the SNP overlap across platforms was low on a genome-wide scale (75,285 SNPs). An attempt to impute a genome-wide dataset comprising only 75,000 SNPs as starting point would have resulted in decreased imputation accuracy in regions of the genome with sparse genotype data. Moreover, it has been shown that different platforms might call SNPs differently and that SNP-specific allele frequencies can differ between platforms (see [41] for further discussion). We conducted multiple case-control GWAS among control subjects within each dataset (i.e. running multiple “null” GWAS) and identified and excluded more than 100 SNPs that showed spurious associations. These results emphasize that although datasets are merged by platform family, problematic SNPs giving rise to spurious associations might still exist and it is important to carefully check for these.

To assess the validity of our data, we conducted two proof-of-principle GWAS. The first trait we studied was BMI, and in line with what expected, we observed strong evidence of associations with known BMI loci including *FTO* and *TMEM18* that both reached genome-wide significance ( $P < 5 \times 10^{-8}$ ). In addition, out of 32 known BMI SNPs we observed nominal significance ( $P < 0.05$ ) for 19 of them, all in the same direction as expected from previous reports. Of note, our sample size ( $n=20,823$ ) is less than 10% of the original GWAS that had a total sample size of 249,766 individuals. Therefore, we would not expect to observe significant associations for all BMI SNPs due to limited power. For VTE, we observed genome-wide significant associations for the *F5* and *ABO* loci that are both known to be associated with VTE. In addition, we also observed a nominal association ( $P=0.007$ ) with the *F11* region. Our BMI and VTE results confirm that GWAS analysis

of secondary traits in this data is valid and provides a platform for future studies of secondary traits. We ran the BMI and VTE analyses twice, the first time without removing duplicates between the datasets (total of 444 pairs), and the second time with the duplicates removed. Although the 444 pairs constitute less than 5% of our total sample size, including them had an impact on the genomic inflation factor (for BMI, the genomic inflation factor went from 1.09 to 1.05 and for VTE, the genomic inflation factor went from 1.02 to 1.00). These results are especially interesting as it is often difficult to identify duplicates across studies when raw data from all participating studies are not available. Care should be taken to remove overlapping subjects across GWAS contributing to a meta-analysis, but any remaining cryptic overlap may inflate association statistics. In that case, statistical adjustment procedures like LD score regression [54] can be used to account for cryptic overlap.

One of the main benefits with collecting comprehensive genetic information on cohort subjects is the opportunity to assess interactions between genetic factors and prospectively collected environmental data. To date, few gene-environment interactions have been identified and although their extent and clinical impact remain an open empirical question, the current lack of homogenous large datasets with both genetic and environmental data has precluded comprehensive investigation. Capitalizing on this GWAS resource, we will be able to explore gene-environment interactions for a plethora of outcomes including complex traits such as height and BMI, but also disease outcomes. It will also allow us to study the impact of environmental factors within genetic strata to identify individuals for whom a particular intervention might be especially important [55-58].

Accumulation of these GWAS data is ongoing and we expect to generate new GWAS data for an

additional 15,000 participants within the next two years, almost doubling our total GWAS sample size. This growing resource will be a core component of future studies aiming to elucidate how genes and the environment impact public health.

# **ACKNOWLEDGEMENTS**

This work was supported by National Institute of Health (P01CA87969, P01CA055075, P01DK070756, U01HG004728, UM1CA186107, UM1CA176726, R01CA49449, R01CA50385, R01CA67262, R01CA131332, R01HL034594, R01HL088521, R01HL35464, R01HL116854, R01EY015473, R01EY022305, P30EY014104, R03DC013373 and R03CA165131). Dr. Pasquale is also supported by a Harvard Medical School Distinguished Ophthalmology Scholar award. The funders had no role in study design, data collection and analysis, decision to publish, or preparation of the manuscript.

## REFERENCES

1. Doll R, Hill AB. The mortality of doctors in relation to their smoking habits: a preliminary report. 1954. *Bmj*. 2004;328(7455):1529-33; discussion 33. doi: 10.1136/bmj.328.7455.1529. PubMed PMID: 15217868; PubMed Central PMCID: PMC437141.
2. Doll R, Hill AB. Lung cancer and other causes of death in relation to smoking; a second report on the mortality of British doctors. *British medical journal*. 1956;2(5001):1071-81. PubMed PMID: 13364389; PubMed Central PMCID: PMC2035864.
3. Kannel WB, Dawber TR, Kagan A, Revotskie N, Stokes J, 3rd. Factors of risk in the development of coronary heart disease--six year follow-up experience. The Framingham Study. *Annals of internal medicine*. 1961;55:33-50. PubMed PMID: 13751193.
4. Willett WC, Stampfer MJ, Manson JE, Colditz GA, Speizer FE, Rosner BA, et al. Intake of trans fatty acids and risk of coronary heart disease among women. *Lancet*. 1993;341(8845):581-5. PubMed PMID: 8094827.
5. Mayers JR, Wu C, Clish CB, Kraft P, Torrence ME, Fiske BP, et al. Elevation of circulating branched-chain amino acids is an early event in human pancreatic adenocarcinoma development. *Nature medicine*. 2014;20(10):1193-8. doi: 10.1038/nm.3686. PubMed PMID: 25261994; PubMed Central PMCID: PMC4191991.
6. Zhang X, Tworoger SS, Eliassen AH, Hankinson SE. Postmenopausal plasma sex hormone levels and breast cancer risk over 20 years of follow-up. *Breast cancer research and treatment*. 2013;137(3):883-92. doi: 10.1007/s10549-012-2391-z. PubMed PMID: 23283524; PubMed Central PMCID: PMC3582409.
7. Manolio TA. Bringing genome-wide association findings into clinical use. *Nature reviews Genetics*. 2013;14(8):549-58. doi: 10.1038/nrg3523. PubMed PMID: 23835440.

- 424 8. Ridker PM, Chasman DI, Zee RY, Parker A, Rose L, Cook NR, et al. Rationale, design, and  
425 methodology of the Women's Genome Health Study: a genome-wide association study of more  
426 than 25,000 initially healthy american women. Clinical chemistry. 2008;54(2):249-55. doi:  
427 10.1373/clinchem.2007.099366. PubMed PMID: 18070814.
- 428 9. Banda Y, Kvale MN, Hoffmaknn TJ, Hesselson SE, Ranatunga D, Tang H, et al.  
429 Characterizing Race/Ethnicity and Genetic Ancestry for 100,000 Subjects in the Genetic  
430 Epidemiology Research on Adult Health and Aging (GERA) Cohort. Genetics. 2015;200(4):1285-  
431 95. doi: 10.1534/genetics.115.178616. PubMed PMID: 26092716; PubMed Central PMCID:  
432 PMCPMC4574246.
- 433 10. Colditz GA, Hankinson SE. The Nurses' Health Study: lifestyle and health among women.  
434 Nat Rev Cancer. 2005;5(5):388-96. Epub 2005/05/03. doi: 10.1038/nrc1608. PubMed PMID:  
435 15864280.
- 436 11. Tworoger SS, Sluss P, Hankinson SE. Association between plasma prolactin  
437 concentrations and risk of breast cancer among predominately premenopausal women. Cancer  
438 research. 2006;66(4):2476-82. doi: 10.1158/0008-5472.CAN-05-3369. PubMed PMID: 16489055.
- 439 12. Giovannucci E, Pollak M, Liu Y, Platz EA, Majeed N, Rimm EB, et al. Nutritional predictors  
440 of insulin-like growth factor I and their relationships to cancer in men. Cancer epidemiology,  
441 biomarkers & prevention : a publication of the American Association for Cancer Research,  
442 cosponsored by the American Society of Preventive Oncology. 2003;12(2):84-9. PubMed PMID:  
443 12582016.
- 444 13. Sesso HD, Gaziano JM, VanDenburgh M, Hennekens CH, Glynn RJ, Buring JE. Comparison  
445 of baseline characteristics and mortality experience of participants and nonparticipants in a  
446 randomized clinical trial: the Physicians' Health Study. Controlled clinical trials. 2002;23(6):686-  
447 702. PubMed PMID: 12505246.

- 448 14. Qi L, Cornelis MC, Kraft P, Stanya KJ, Linda Kao WH, Pankow JS, et al. Genetic variants at  
449 2q24 are associated with susceptibility to type 2 diabetes. Human molecular genetics.  
450 2010;19(13):2706-15. doi: 10.1093/hmg/ddq156. PubMed PMID: 20418489; PubMed Central  
451 PMCID: PMC2883345.
- 452 15. Jensen MK, Pers TH, Dworzynski P, Girman CJ, Brunak S, Rimm EB. Protein interaction-  
453 based genome-wide analysis of incident coronary heart disease. Circulation Cardiovascular  
454 genetics. 2011;4(5):549-56. doi: 10.1161/CIRCGENETICS.111.960393. PubMed PMID: 21880673;  
455 PubMed Central PMCID: PMC3197770.
- 456 16. Hunter DJ, Kraft P, Jacobs KB, Cox DG, Yeager M, Hankinson SE, et al. A genome-wide  
457 association study identifies alleles in FGFR2 associated with risk of sporadic postmenopausal  
458 breast cancer. Nature genetics. 2007;39(7):870-4. doi: 10.1038/ng2075. PubMed PMID:  
459 17529973; PubMed Central PMCID: PMC3493132.
- 460 17. De Vivo I, Prescott J, Setiawan VW, Olson SH, Wentzensen N, Australian National  
461 Endometrial Cancer Study G, et al. Genome-wide association study of endometrial cancer in  
462 E2C2. Human genetics. 2014;133(2):211-24. doi: 10.1007/s00439-013-1369-1. PubMed PMID:  
463 24096698; PubMed Central PMCID: PMC3898362.
- 464 18. Schumacher FR, Berndt SI, Siddiq A, Jacobs KB, Wang Z, Lindstrom S, et al. Genome-wide  
465 association study identifies new prostate cancer susceptibility loci. Human molecular genetics.  
466 2011;20(19):3867-75. doi: 10.1093/hmg/ddr295. PubMed PMID: 21743057; PubMed Central  
467 PMCID: PMC3168287.
- 468 19. Peters U, Jiao S, Schumacher FR, Hutter CM, Aragaki AK, Baron JA, et al. Identification of  
469 Genetic Susceptibility Loci for Colorectal Tumors in a Genome-Wide Meta-analysis.  
470 Gastroenterology. 2013;144(4):799-807 e24. doi: 10.1053/j.gastro.2012.12.020. PubMed PMID:  
471 23266556; PubMed Central PMCID: PMC3636812.

- 472 20. Stevens KN, Lindstrom S, Scott CG, Thompson D, Sellers TA, Wang X, et al. Identification  
473 of a novel percent mammographic density locus at 12q24. Human molecular genetics.  
474 2012;21(14):3299-305. doi: 10.1093/hmg/dds158. PubMed PMID: 22532574; PubMed Central  
475 PMCID: PMC3384385.
- 476 21. Lindstrom S, Thompson DJ, Paterson AD, Li J, Gierach GL, Scott C, et al. Genome-wide  
477 association study identifies multiple loci associated with both mammographic density and breast  
478 cancer risk. Nature communications. 2014;5:5303. doi: 10.1038/ncomms6303. PubMed PMID:  
479 25342443; PubMed Central PMCID: PMC4320806.
- 480 22. Lettre G, Jackson AU, Gieger C, Schumacher FR, Berndt SI, Sanna S, et al. Identification of  
481 ten loci associated with height highlights new biological pathways in human growth. Nature  
482 genetics. 2008;40(5):584-91. doi: 10.1038/ng.125. PubMed PMID: 18391950; PubMed Central  
483 PMCID: PMC2687076.
- 484 23. Loos RJ, Lindgren CM, Li S, Wheeler E, Zhao JH, Prokopenko I, et al. Common variants  
485 near MC4R are associated with fat mass, weight and risk of obesity. Nature genetics.  
486 2008;40(6):768-75. doi: 10.1038/ng.140. PubMed PMID: 18454148; PubMed Central PMCID:  
487 PMC2669167.
- 488 24. Heid IM, Jackson AU, Randall JC, Winkler TW, Qi L, Steinthorsdottir V, et al. Meta-  
489 analysis identifies 13 new loci associated with waist-hip ratio and reveals sexual dimorphism in  
490 the genetic basis of fat distribution. Nature genetics. 2010;42(11):949-60. doi: 10.1038/ng.685.  
491 PubMed PMID: 20935629; PubMed Central PMCID: PMC3000924.
- 492 25. Han J, Kraft P, Nan H, Guo Q, Chen C, Qureshi A, et al. A genome-wide association study  
493 identifies novel alleles associated with hair color and skin pigmentation. PLoS genetics.  
494 2008;4(5):e1000074. doi: 10.1371/journal.pgen.1000074. PubMed PMID: 18483556; PubMed  
495 Central PMCID: PMC2367449.

- 496 26. He C, Kraft P, Chen C, Buring JE, Pare G, Hankinson SE, et al. Genome-wide association  
497 studies identify loci associated with age at menarche and age at natural menopause. *Nature*  
498 *genetics*. 2009;41(6):724-8. doi: 10.1038/ng.385. PubMed PMID: 19448621; PubMed Central  
499 PMCID: PMC2888798.
- 500 27. Caporaso N, Gu F, Chatterjee N, Sheng-Chih J, Yu K, Yeager M, et al. Genome-wide and  
501 candidate gene association study of cigarette smoking behaviors. *PloS one*. 2009;4(2):e4653.  
502 doi: 10.1371/journal.pone.0004653. PubMed PMID: 19247474; PubMed Central PMCID:  
503 PMC2644817.
- 504 28. Prescott J, Kraft P, Chasman DI, Savage SA, Mirabello L, Berndt SI, et al. Genome-wide  
505 association study of relative telomere length. *PloS one*. 2011;6(5):e19635. doi:  
506 10.1371/journal.pone.0019635. PubMed PMID: 21573004; PubMed Central PMCID:  
507 PMC3091863.
- 508 29. Lindstrom S, Vachon CM, Li J, Varghese J, Thompson D, Warren R, et al. Common  
509 variants in ZNF365 are associated with both mammographic density and breast cancer risk.  
510 *Nature genetics*. 2011;43(3):185-7. doi: 10.1038/ng.760. PubMed PMID: 21278746; PubMed  
511 Central PMCID: PMC3076615.
- 512 30. Nan H, Xu M, Zhang J, Zhang M, Kraft P, Qureshi AA, et al. Genome-wide association  
513 study identifies nidogen 1 (NID1) as a susceptibility locus to cutaneous nevi and melanoma risk.  
514 *Human molecular genetics*. 2011;20(13):2673-9. doi: 10.1093/hmg/ddr154. PubMed PMID:  
515 21478494; PubMed Central PMCID: PMC3110001.
- 516 31. Hek K, Demirkan A, Lahti J, Terracciano A, Teumer A, Cornelis MC, et al. A genome-wide  
517 association study of depressive symptoms. *Biological psychiatry*. 2013;73(7):667-78. doi:  
518 10.1016/j.biopsych.2012.09.033. PubMed PMID: 23290196; PubMed Central PMCID:  
519 PMC3845085.



32. The C, Caffeine Genetics C, Cornelis MC, Byrne EM, Esko T, Nalls MA, et al. Genome-wide meta-analysis identifies six novel loci associated with habitual coffee consumption. *Molecular psychiatry*. 2014. doi: 10.1038/mp.2014.107. PubMed PMID: 25288136; PubMed Central PMCID: PMC4388784.
33. Hazra A, Kraft P, Selhub J, Giovannucci EL, Thomas G, Hoover RN, et al. Common variants of FUT2 are associated with plasma vitamin B12 levels. *Nature genetics*. 2008;40(10):1160-2. doi: 10.1038/ng.210. PubMed PMID: 18776911; PubMed Central PMCID: PMC2673801.
34. Hazra A, Kraft P, Lazarus R, Chen C, Chanock SJ, Jacques P, et al. Genome-wide significant predictors of metabolites in the one-carbon metabolism pathway. *Human molecular genetics*. 2009;18(23):4677-87. doi: 10.1093/hmg/ddp428. PubMed PMID: 19744961; PubMed Central PMCID: PMC2773275.
35. Prescott J, Thompson DJ, Kraft P, Chanock SJ, Audley T, Brown J, et al. Genome-wide association study of circulating estradiol, testosterone, and sex hormone-binding globulin in postmenopausal women. *PloS one*. 2012;7(6):e37815. doi: 10.1371/journal.pone.0037815. PubMed PMID: 22675492; PubMed Central PMCID: PMC3366971.
36. Ahn J, Yu K, Stolzenberg-Solomon R, Simon KC, McCullough ML, Gallicchio L, et al. Genome-wide association study of circulating vitamin D levels. *Human molecular genetics*. 2010;19(13):2739-45. doi: 10.1093/hmg/ddq155. PubMed PMID: 20418485; PubMed Central PMCID: PMC2883344.
37. Major JM, Yu K, Wheeler W, Zhang H, Cornelis MC, Wright ME, et al. Genome-wide association study identifies common variants associated with circulating vitamin E levels. *Human molecular genetics*. 2011;20(19):3876-83. doi: 10.1093/hmg/ddr296. PubMed PMID: 21729881; PubMed Central PMCID: PMC3168288.

544 38. Mondul AM, Yu K, Wheeler W, Zhang H, Weinstein SJ, Major JM, et al. Genome-wide  
545 association study of circulating retinol levels. *Human molecular genetics*. 2011;20(23):4724-31.  
546 doi: 10.1093/hmg/ddr387. PubMed PMID: 21878437; PubMed Central PMCID: PMC3209826.

547 39. Qi L, Cornelis MC, Kraft P, Jensen M, van Dam RM, Sun Q, et al. Genetic variants in ABO  
548 blood group region, plasma soluble E-selectin levels and risk of type 2 diabetes. *Human*  
549 *molecular genetics*. 2010;19(9):1856-62. doi: 10.1093/hmg/ddq057. PubMed PMID: 20147318;  
550 PubMed Central PMCID: PMC2850622.

551 40. Monsees GM, Tamimi RM, Kraft P. Genome-wide association scans for secondary traits  
552 using case-control samples. *Genetic epidemiology*. 2009;33(8):717-28. doi: 10.1002/gepi.20424.  
553 PubMed PMID: 19365863; PubMed Central PMCID: PMC2790028.

554 41. Sinnott JA, Kraft P. Artifact due to differential error when cases and controls are  
555 imputed from different platforms. *Human genetics*. 2012;131(1):111-9. doi: 10.1007/s00439-  
556 011-1054-1. PubMed PMID: 21735171; PubMed Central PMCID: PMC3217156.

557 42. Genomes Project C, Abecasis GR, Auton A, Brooks LD, DePristo MA, Durbin RM, et al. An  
558 integrated map of genetic variation from 1,092 human genomes. *Nature*. 2012;491(7422):56-65.  
559 doi: 10.1038/nature11632. PubMed PMID: 23128226; PubMed Central PMCID: PMC3498066.

560 43. Amundadottir L, Kraft P, Stolzenberg-Solomon RZ, Fuchs CS, Petersen GM, Arslan AA, et  
561 al. Genome-wide association study identifies variants in the ABO locus associated with  
562 susceptibility to pancreatic cancer. *Nature genetics*. 2009;41(9):986-90. doi: 10.1038/ng.429.  
563 PubMed PMID: 19648918; PubMed Central PMCID: PMC2839871.

564 44. Wiggs JL, Kang JH, Yaspan BL, Mirel DB, Laurie C, Crenshaw A, et al. Common variants  
565 near CAV1 and CAV2 are associated with primary open-angle glaucoma in Caucasians from the  
566 USA. *Human molecular genetics*. 2011;20(23):4707-13. doi: 10.1093/hmg/ddr382. PubMed  
567 PMID: 21873608; PubMed Central PMCID: PMC3209825.

45. Rajaraman P, Melin BS, Wang Z, McKean-Cowdin R, Michaud DS, Wang SS, et al. Genome-wide association study of glioma and meta-analysis. Human genetics. 2012;131(12):1877-88. doi: 10.1007/s00439-012-1212-0. PubMed PMID: 22886559; PubMed Central PMCID: PMC3761216.
46. Johnson EO, Hancock DB, Levy JL, Gaddis NC, Saccone NL, Bierut LJ, et al. Imputation across genotyping arrays for genome-wide association studies: assessment of bias and a correction strategy. Human genetics. 2013;132(5):509-22. doi: 10.1007/s00439-013-1266-7. PubMed PMID: 23334152; PubMed Central PMCID: PMC3628082.
47. Uh HW, Deelen J, Beekman M, Helmer Q, Rivadeneira F, Hottenga JJ, et al. How to deal with the early GWAS data when imputing and combining different arrays is necessary. European journal of human genetics : EJHG. 2012;20(5):572-6. doi: 10.1038/ejhg.2011.231. PubMed PMID: 22189269; PubMed Central PMCID: PMC3330212.
48. Price AL, Patterson NJ, Plenge RM, Weinblatt ME, Shadick NA, Reich D. Principal components analysis corrects for stratification in genome-wide association studies. Nature genetics. 2006;38(8):904-9. doi: 10.1038/ng1847. PubMed PMID: 16862161.
49. Yu K, Wang Z, Li Q, Wacholder S, Hunter DJ, Hoover RN, et al. Population substructure and control selection in genome-wide association studies. PloS one. 2008;3(7):e2551. doi: 10.1371/journal.pone.0002551. PubMed PMID: 18596976; PubMed Central PMCID: PMC2432498.
50. Li Y, Willer CJ, Ding J, Scheet P, Abecasis GR. MaCH: using sequence and genotype data to estimate haplotypes and unobserved genotypes. Genetic epidemiology. 2010;34(8):816-34. doi: 10.1002/gepi.20533. PubMed PMID: 21058334; PubMed Central PMCID: PMC3175618.
51. Howie B, Fuchsberger C, Stephens M, Marchini J, Abecasis GR. Fast and accurate genotype imputation in genome-wide association studies through pre-phasing. Nature genetics.

592 2012;44(8):955-9. doi: 10.1038/ng.2354. PubMed PMID: 22820512; PubMed Central PMCID:  
593 PMC3696580.

594 52. Willer CJ, Li Y, Abecasis GR. METAL: fast and efficient meta-analysis of genomewide  
595 association scans. *Bioinformatics*. 2010;26(17):2190-1. doi: 10.1093/bioinformatics/btq340.  
596 PubMed PMID: 20616382; PubMed Central PMCID: PMC2922887.

597 53. Speliotes EK, Willer CJ, Berndt SI, Monda KL, Thorleifsson G, Jackson AU, et al.  
598 Association analyses of 249,796 individuals reveal 18 new loci associated with body mass index.  
599 *Nature genetics*. 2010;42(11):937-48. doi: 10.1038/ng.686. PubMed PMID: 20935630; PubMed  
600 Central PMCID: PMC3014648.

601 54. Bulik-Sullivan BK, Loh PR, Finucane HK, Ripke S, Yang J, Schizophrenia Working Group of  
602 the Psychiatric Genomics C, et al. LD Score regression distinguishes confounding from  
603 polygenicity in genome-wide association studies. *Nature genetics*. 2015;47(3):291-5. doi:  
604 10.1038/ng.3211. PubMed PMID: 25642630.

605 55. Qi Q, Kilpelainen TO, Downer MK, Tanaka T, Smith CE, Sluijs I, et al. FTO genetic variants,  
606 dietary intake and body mass index: insights from 177 330 individuals. *Human molecular*  
607 *genetics*. 2014. doi: 10.1093/hmg/ddu411. PubMed PMID: 25104851.

608 56. Qi Q, Chu AY, Kang JH, Huang J, Rose LM, Jensen MK, et al. Fried food consumption,  
609 genetic risk, and body mass index: gene-diet interaction analysis in three US cohort studies. *Bmj*.  
610 2014;348:g1610. doi: 10.1136/bmj.g1610. PubMed PMID: 24646652; PubMed Central PMCID:  
611 PMC3959253.

612 57. Ahmad S, Rukh G, Varga TV, Ali A, Kurbasic A, Shungin D, et al. Gene x physical activity  
613 interactions in obesity: combined analysis of 111,421 individuals of European ancestry. *PLoS*  
614 *genetics*. 2013;9(7):e1003607. doi: 10.1371/journal.pgen.1003607. PubMed PMID: 23935507;  
615 PubMed Central PMCID: PMC3723486.

616 58. Qi Q, Chu AY, Kang JH, Jensen MK, Curhan GC, Pasquale LR, et al. Sugar-sweetened  
617 beverages and genetic risk of obesity. The New England journal of medicine. 2012;367(15):1387-  
618 96. doi: 10.1056/NEJMoa1203039. PubMed PMID: 22998338; PubMed Central PMCID:  
619 PMC3518794.  
620

621

**Supplemental Figure 1:** Proportion of successfully imputed markers on the Affymetrix platform

**Supplemental Figure 2:** Proportion of successfully imputed markers on the Illumina HumanHap platform.

**Supplemental Figure 3:** Proportion of successfully imputed markers on the Illumina Omniexpress platform.

**Supplemental Figure 4a:** QQ-plot for GWAS analysis of body mass index on the Illumina Omniexpress platform (n=5,844).

**Supplemental Figure 4b:** QQ-plot for GWAS analysis of body mass index on the Affymetrix platform (n=7,677).

**Supplemental Figure 4c:** QQ-plot for GWAS analysis of body mass index on the Illumina HumanHap platform (n=6,762).

**Supplemental Figure 5a:** QQ-plot for GWAS analysis of venous on the Illumina Omniexpress platform (406 cases and 4,786 controls).

**Supplemental Figure 5b:** QQ-plot for GWAS analysis of venous on the Illumina Omniexpress platform (406 cases and 4,786 controls).

**Supplemental Figure 5c:** QQ-plot for GWAS analysis of venous on the Affymetrix platform (532 cases and 7,147 controls).
